# Supplementary material for: Electrochemical nitrogen reduction to ammonia using mesoporous iron oxide with abundant oxygen vacancies
Source: Royal Society of Chemistry journal article supplement (doi:10.1039/d3se00369h), 2023-01-01
Supplement: d3se00369h1.pdf [file d3se00369h1.pdf]

Electronic Supplementary Information (ESI) for

## **Electrochemical nitrogen reduction to ammonia using mesoporous iron oxide with abundant oxygen vacancies**

Toshihiro Takashima,<sup>\*ab</sup> Takumi Mochida<sup>a</sup> and Hiroshi Irie<sup>ab</sup>

<sup>a</sup>. *Integrated Graduate School of Medicine, Engineering and Agricultural Sciences, University of Yamanashi, 4-3-11 Takeda, Kofu, Yamanashi 400-8511, Japan*

<sup>b</sup>. *Clean Energy Research Center, University of Yamanashi, 4-3-11 Takeda, Kofu, Yamanashi 400-8511, Japan*

### Contents

ESI-1) Schematic illustration of an electrochemical cell used in this study. (Fig. S1)

ESI-2) Determination of NH<sub>3</sub>. (Fig. S2)

ESI-3) Determination of N<sub>2</sub>H<sub>4</sub>. (Fig. S3)

ESI-4) TEM image of KIT-6 template. (Fig. S4)

ESI-5) Results of XPS measurements. (Fig. S5–S7)

ESI-6) H<sub>2</sub> yield and FE of the HER. (Fig. S8)

ESI-7) Characterization of meso- $\alpha$ -Fe<sub>2</sub>O<sub>3</sub> after the stability test. (Fig. S9)

ESI-8) ECSA determination using electrochemical double-layer capacitance. (Fig. S10)

ESI-9) N<sub>2</sub>-TPD profiles of meso- $\alpha$ -Fe<sub>2</sub>O<sub>3</sub> and nano- $\alpha$ -Fe<sub>2</sub>O<sub>3</sub>. (Fig. S11)

ESI-10) Computational calculation details. (Table S1)

ESI-11) Comparison of NRR performances of Fe-oxide electrocatalysts. (Table S2)

ESI-12) Simulation of proton adsorption. (Table S3)

ESI-1) Schematic illustration of an electrochemical cell used in this study.

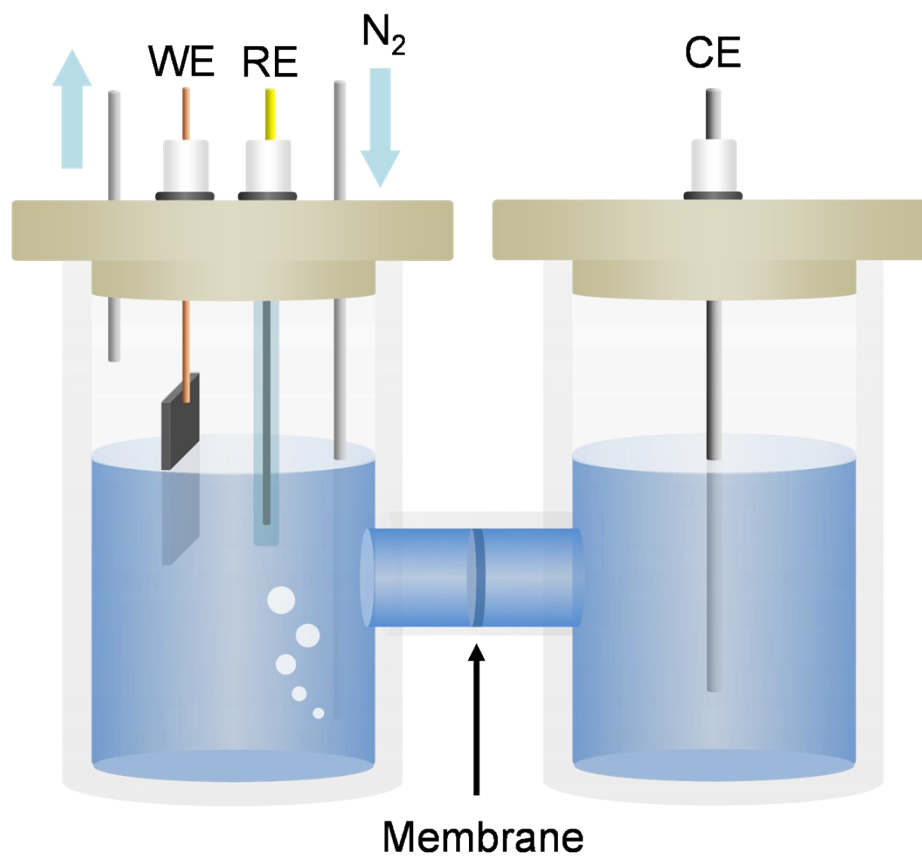

**Fig. S1** Schematic illustration of an H-type electrochemical cell used in this study. The electrolyte was continuously purged with N<sub>2</sub> gas throughout the measurements.

### ESI-2) Determination of $\text{NH}_3$ .

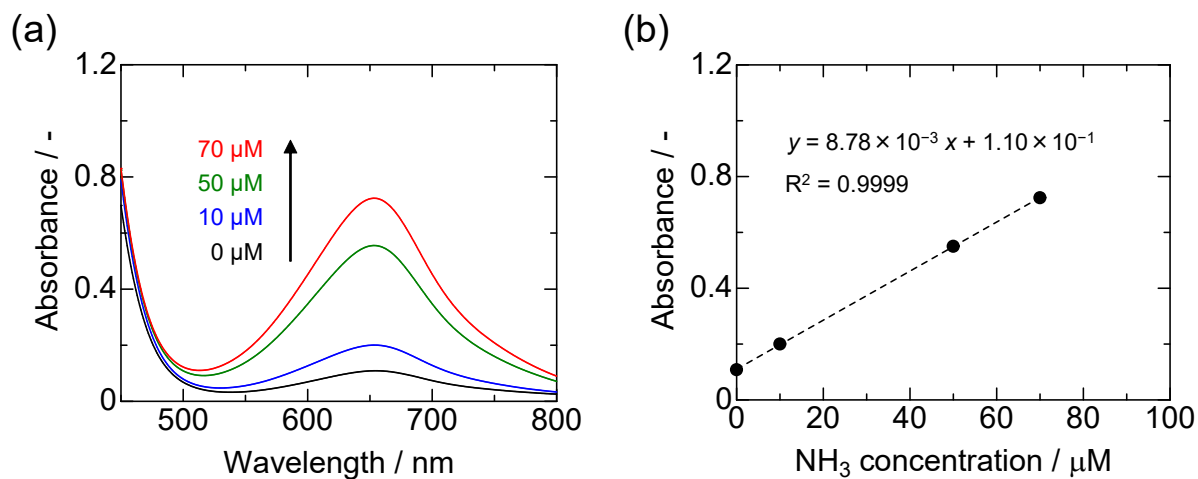

**Fig. S2** (a) UV-vis absorption spectra of indophenol assays with  $\text{NH}_4\text{Cl}$  after incubated for 1 h at room temperature. (b) Calibration curve used for calculation of  $\text{NH}_3$  concentrations.

### ESI-3) Determination of $\text{N}_2\text{H}_4$ .

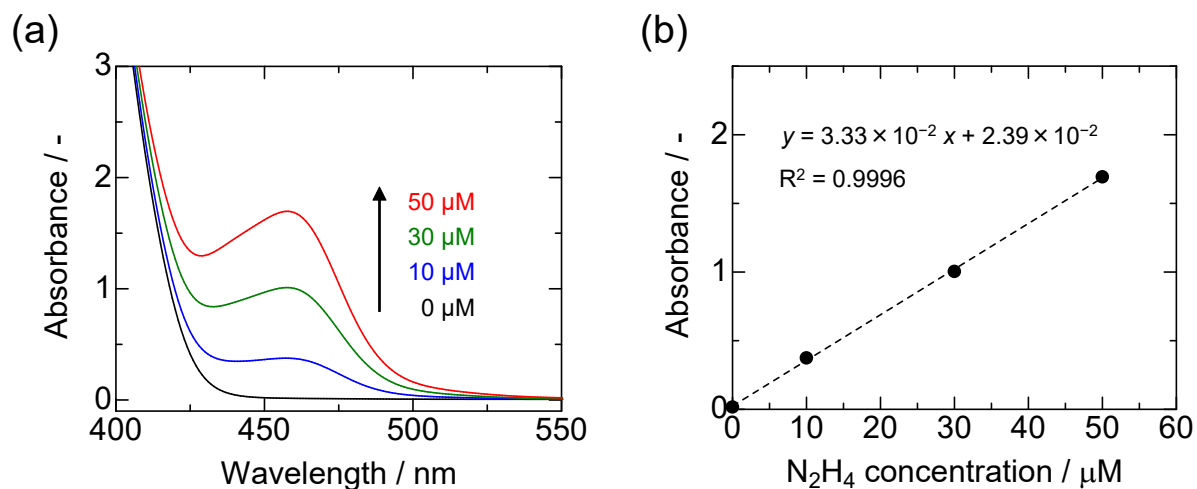

**Fig. S3** (a) UV-vis absorption spectra of indophenol assays with  $\text{N}_2\text{H}_4$  after incubated for 10 min at room temperature. (b) Calibration curve used for calculation of  $\text{N}_2\text{H}_4$  concentrations.

ESI-4) TEM image of KIT-6 template.

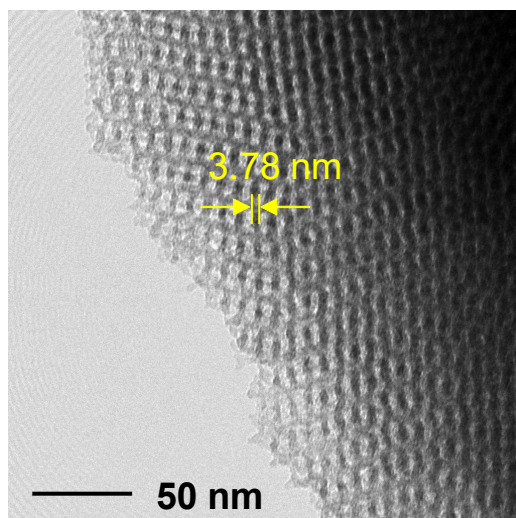

Fig. S4 TEM image of KIT-6 template.

ESI-5) Results of XPS measurements.

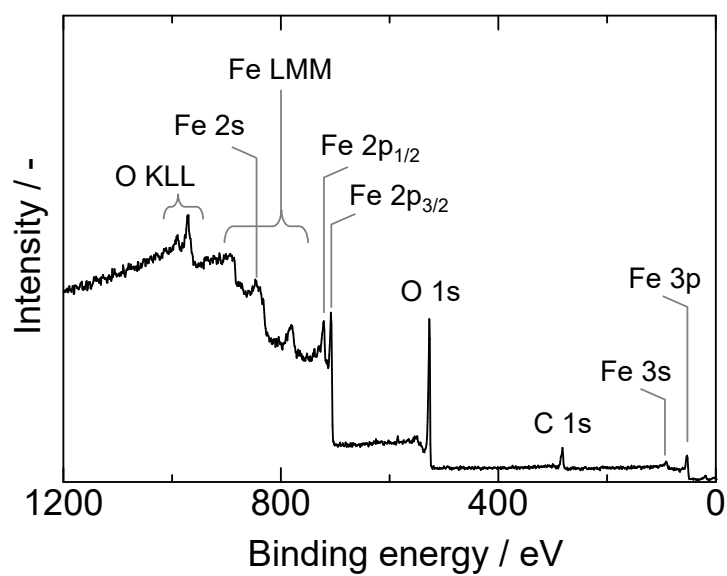

Fig. S5 XPS survey spectrum of meso- $\alpha$ -Fe<sub>2</sub>O<sub>3</sub>.

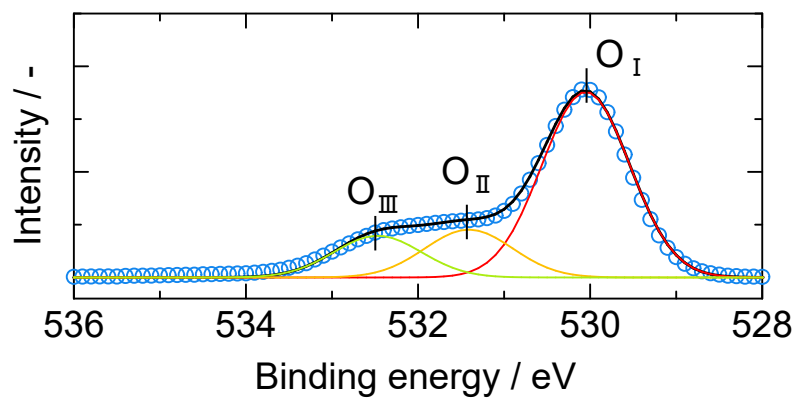

**Fig. S6** XPS O 1s spectrum of nano- $\alpha$ -Fe<sub>2</sub>O<sub>3</sub> after the KOH treatment.

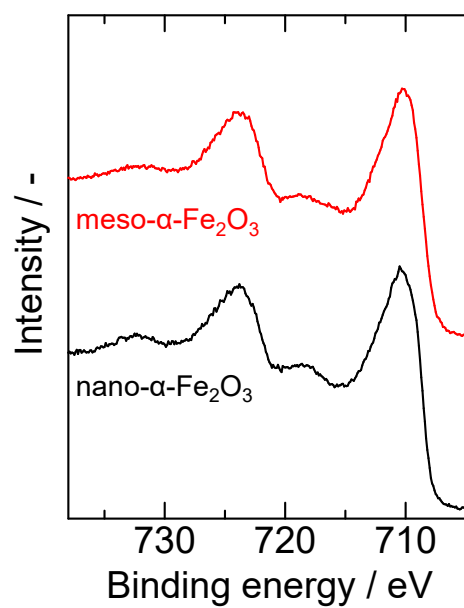

**Fig. S7** XPS Fe 2p spectra of meso- $\alpha$ -Fe<sub>2</sub>O<sub>3</sub> and nano- $\alpha$ -Fe<sub>2</sub>O<sub>3</sub>.

ESI-6) H<sub>2</sub> yield and FE of the HER.

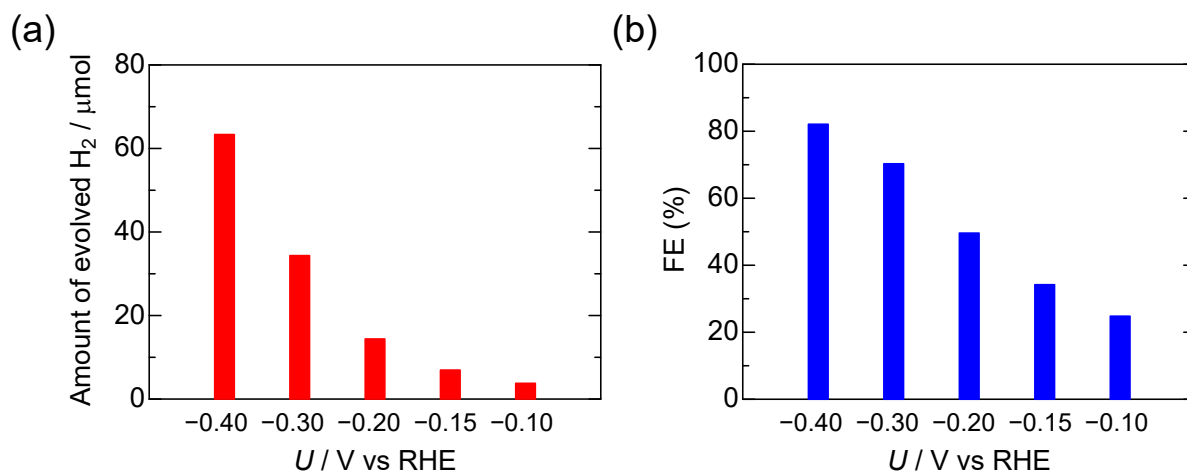

**Fig. S8** (a) The amounts of evolved H<sub>2</sub> and (b) the calculated FEs of the H<sub>2</sub> evolution reaction at each given potential.

ESI-7) Characterization of meso- $\alpha$ -Fe<sub>2</sub>O<sub>3</sub> after the stability test.

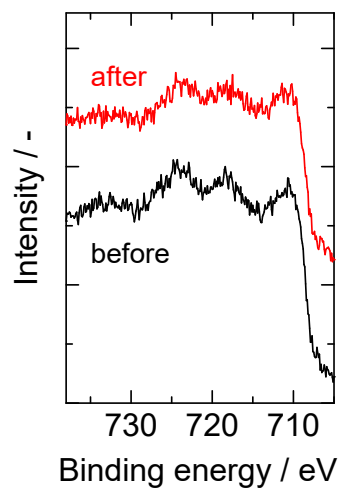

**Fig. S9** XPS Fe 2p spectra of meso- $\alpha$ -Fe<sub>2</sub>O<sub>3</sub> coated on the electrode before and after the six consecutive cycling tests at -0.15 V.

ESI-8) ECSA determination using electrochemical double-layer capacitance.

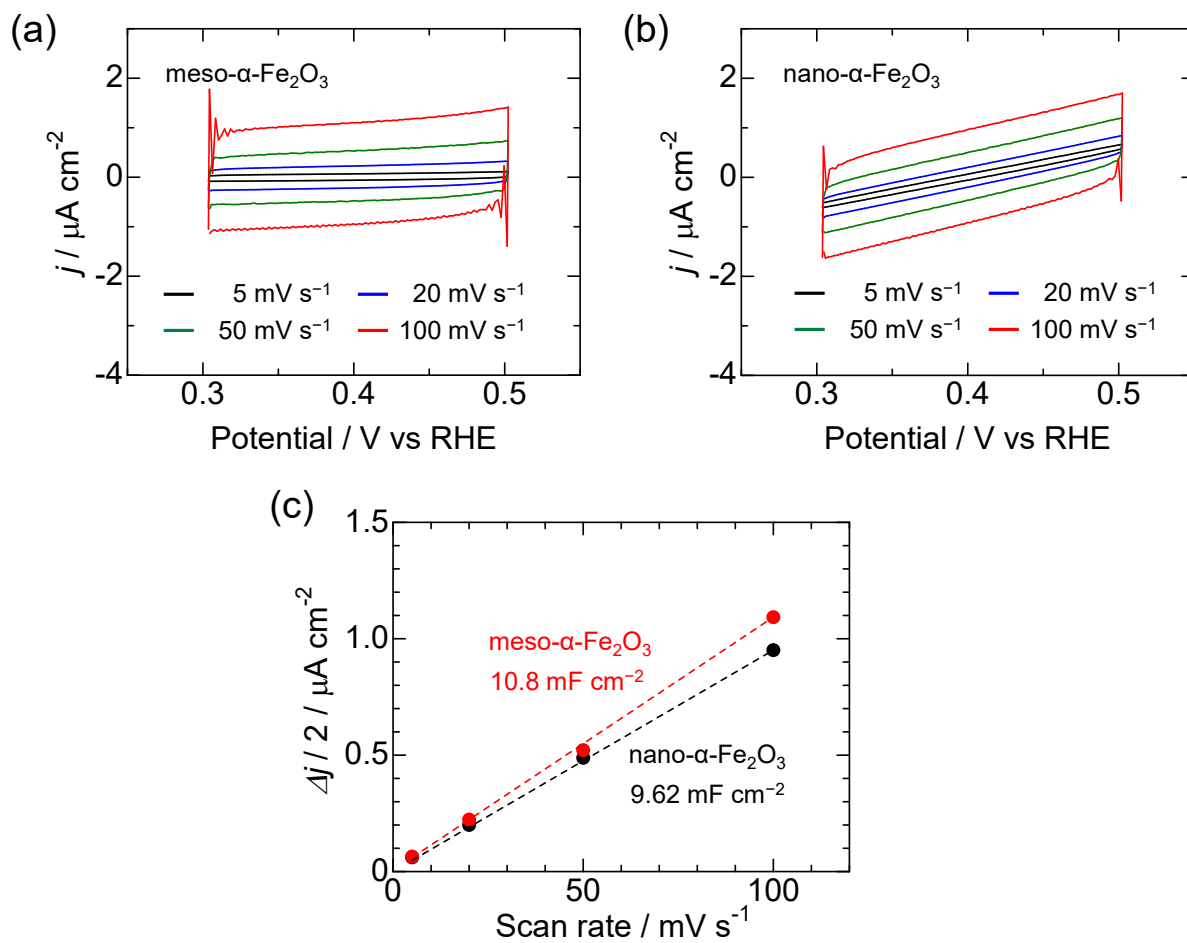

**Fig. S10** Cyclic voltamograms of (a) meso- $\alpha$ -Fe<sub>2</sub>O<sub>3</sub> and (b) nano- $\alpha$ -Fe<sub>2</sub>O<sub>3</sub> at different scan rates, and (c) corresponding plots of current density differences ( $\Delta j/2$ ) at 0.4 V versus scan rate.

ESI-9) N<sub>2</sub>-TPD profiles of meso- $\alpha$ -Fe<sub>2</sub>O<sub>3</sub> and nano- $\alpha$ -Fe<sub>2</sub>O<sub>3</sub>.

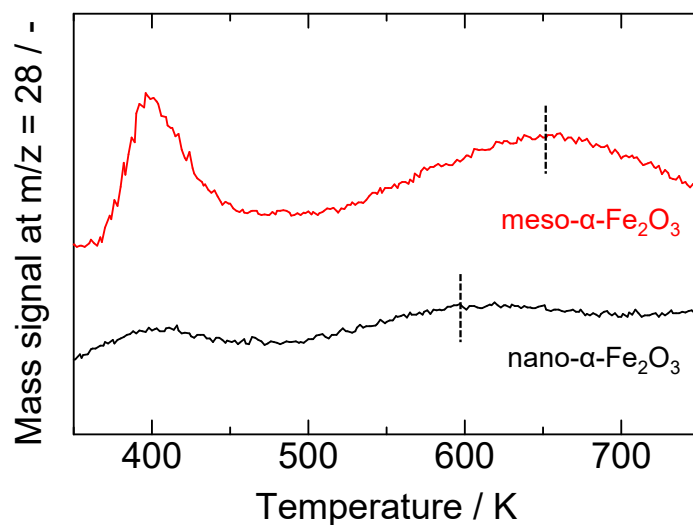

**Fig. S11** N<sub>2</sub> temperature-programmed desorption (N<sub>2</sub>-TPD) profiles of meso- $\alpha$ -Fe<sub>2</sub>O<sub>3</sub> and nano- $\alpha$ -Fe<sub>2</sub>O<sub>3</sub>. Both samples show two peaks in the range of 350-750 K. The former peak at a lower temperature can be assigned to the desorption of physically adsorbed N<sub>2</sub> and the latter peak at higher temperature can be attributed to the desorption of chemically adsorbed N<sub>2</sub>.



ESI-10) Computational calculation details.

**Table S1** Calculated zero-point energy (ZPE) and entropy corrections (TS) for all relevant compounds and adsorbed intermediates.

| <b>Species</b>      | <b>ZPE / eV</b> | <b>TS / eV</b> |
|---------------------|-----------------|----------------|
| N <sub>2</sub> (g)  | 0.27            | 0.41           |
| H <sub>2</sub> (g)  | 0.15            | 0.60           |
| NH <sub>3</sub> (g) | 0.89            | 0.60           |
| *NN                 | 0.22            | 0.21           |
| *NNH                | 0.52            | 0.14           |
| *NNHH               | 0.80            | 0.13           |
| *N                  | 0.09            | 0.06           |
| *NH                 | 0.45            | 0.06           |
| *NH <sub>2</sub>    | 0.70            | 0.08           |
| *NH <sub>3</sub>    | 1.00            | 0.07           |

## ESI-11) Comparison of NRR performances of Fe-oxide electrocatalysts.

**Table S2** Comparison of NRR performances of Fe-oxide electrocatalysts in the literature.

| Catalyst                                               | Electrolyte                           | Potential           | NH <sub>3</sub> yield                                                        | FE (%) | Ref.       |
|--------------------------------------------------------|---------------------------------------|---------------------|------------------------------------------------------------------------------|--------|------------|
| Fe <sub>2</sub> O <sub>3</sub> /CNT                    | 0.5 M KOH                             | -2.0 V (vs Ag/AgCl) | 0.534 μg h <sup>-1</sup> cm <sup>-2</sup>                                    | 0.164  | [1]        |
| γ-Fe <sub>2</sub> O <sub>3</sub>                       | 0.1 M KOH                             | 0.0 V (vs RHE)      | 12.5 nmol h <sup>-1</sup> mg <sub>cat</sub> <sup>-1</sup>                    | 1.9    | [2]        |
| o-Fe <sub>2</sub> O <sub>3</sub> -Ar                   | 0.1 M KOH                             | -0.9 V (vs Ag/AgCl) | 0.46 μg h <sup>-1</sup> cm <sup>-2</sup>                                     | 6.04   | [3]        |
| Fe/Fe <sub>3</sub> O <sub>4</sub>                      | 0.1 M PBS                             | -0.3 V (vs RHE)     | 0.19 μg h <sup>-1</sup> cm <sup>-2</sup>                                     | 8.29   | [4]        |
| Fe <sub>2</sub> O <sub>3</sub> nanorod                 | 0.1 M Na <sub>2</sub> SO <sub>4</sub> | -0.8 V (vs RHE)     | 15.9 μg h <sup>-1</sup> mg <sub>cat</sub> <sup>-1</sup>                      | 0.94   | [5]        |
| rGO/Fe@Fe <sub>3</sub> O <sub>4</sub> /CP              | 0.2 M NaHCO <sub>3</sub>              | -0.3 V (vs RHE)     | 1.3 × 10 <sup>-10</sup> mol s <sup>-1</sup> cm <sup>-2</sup>                 | 6.25   | [6]        |
| γ-Fe <sub>2</sub> O <sub>3</sub> -NC/CF                | 0.1 M HCl                             | -0.1 V (vs RHE)     | 11.7 × 10 <sup>-10</sup> mol s <sup>-1</sup> mg <sub>cat</sub> <sup>-1</sup> | 12.3   | [7]        |
| Fe <sub>2</sub> O <sub>3</sub> /TiO <sub>2</sub> /C    | 1.0 M KOH                             | -0.577 V (vs RHE)   | 2.7 × 10 <sup>-10</sup> mol s <sup>-1</sup> mg <sub>cat</sub> <sup>-1</sup>  | 0.31   | [8]        |
| Fe <sub>2</sub> O <sub>3</sub> nanorod/CC              | 0.1 M Na <sub>2</sub> SO <sub>4</sub> | -0.4 V (vs RHE)     | 13.6 μg h <sup>-1</sup> mg <sub>cat</sub> <sup>-1</sup>                      | 7.69   | [9]        |
| Fe <sub>2</sub> O <sub>3</sub> -IL                     | 0.1 M KOH                             | -0.3 V (vs RHE)     | 32.1 μg h <sup>-1</sup> mg <sub>cat</sub> <sup>-1</sup>                      | 6.63   | [10]       |
| Au/Fe <sub>3</sub> O <sub>4</sub>                      | 0.1 M KOH                             | -0.2 V (vs RHE)     | 21.4 μg h <sup>-1</sup> mg <sub>cat</sub> <sup>-1</sup>                      | 10.5   | [11]       |
| Fe <sub>2</sub> O <sub>3</sub> NP                      | 0.1 M Na <sub>2</sub> SO <sub>4</sub> | -0.5 V (vs RHE)     | 22 μg h <sup>-1</sup> mg <sub>cat</sub> <sup>-1</sup>                        | 3.5    | [12]       |
| Fe <sub>3</sub> C/Fe <sub>2</sub> O <sub>3</sub> /Fe/C | 6M KOH                                | 0.1 V (vs RHE)      | 0.3 μg h <sup>-1</sup> mg <sub>cat</sub> <sup>-1</sup>                       | 0.38   | [13]       |
| Zn-doped Fe <sub>2</sub> O <sub>3</sub>                | 0.1 M Na <sub>2</sub> SO <sub>4</sub> | -0.5 V (vs RHE)     | 15.1 μg h <sup>-1</sup> mg <sub>cat</sub> <sup>-1</sup>                      | 10.4   | [14]       |
| meso-α-Fe <sub>2</sub> O <sub>3</sub>                  | 0.1 M Li <sub>2</sub> SO <sub>4</sub> | -0.15 V (vs RHE)    | 15.3 μg h <sup>-1</sup> mg <sub>cat</sub> <sup>-1</sup>                      | 13.2   | This study |

ESI-12) Simulation of proton adsorption.

**Table S3** Calculated Gibbs free energy changes ( $\Delta G$ ) upon proton adsorption on meso- $\alpha$ - $\text{Fe}_2\text{O}_3$  and nano- $\alpha$ - $\text{Fe}_2\text{O}_3$ .

| <b>Catalysts</b>                         | <b><math>\Delta G / \text{eV}</math></b> |
|------------------------------------------|------------------------------------------|
| meso- $\alpha$ - $\text{Fe}_2\text{O}_3$ | -0.328                                   |
| nano- $\alpha$ - $\text{Fe}_2\text{O}_3$ | -0.329                                   |

## References

- [1] S. Chen, S. Perathoner, C. Ampelli, C. Mebrahtu, D. Su and G. Centi, *ACS Sustain. Chem. Eng.*, 2017, **5**, 7393.
- [2] J. Kong, A. Lim, C. Yoon, J. H. Jang, H. C. Ham, J. Han, S. Nam, D. Kim, Y.-E. Sung, J. Choi and H. S. Park, *ACS Sustain. Chem. Eng.*, 2017, **5**, 10986.
- [3] X. Cui, C. Tang, X. M. Liu, C. Wang, W. Ma and Q. Zhang, *Chem. Eur. J.*, 2018, **24**, 18494.
- [4] L. Hu, A. Khaniya, J. Wang, G. Chen, W. E. Kaden and X. Feng, *ACS Catal.*, 2018, **8**, 9312.
- [5] X. Xiang, Z. Wang, X. Shi, M. Fan and X. Sun, *ChemCatChem*, 2018, **10**, 4530.
- [6] C. Li, Y. Fu, Z. Wu, J. Xia and X. Wang, *Nanoscale*, 2019, **11**, 12997.
- [7] Y. Li, Y. Kong, Y. Hou, B. Yang, Z. Li, L. Lei and Z. Wen, *ACS Sustain. Chem. Eng.*, 2019, **7**, 8853.
- [8] R. Manjunatha, A. Karajic, V. Goldstein and A. Schechter, *ACS Appl. Mater. Interfaces*, 2019, **11**, 7981.
- [9] Z. Wang, K. Zheng, S. Liu, Z. Dai, Y. Xu, X. Li, H. Wang and L. Wang, *ACS Sustain. Chem. Eng.*, 2019, **7**, 11754.
- [10] C. Zhang, S. Liu, T. Chen, Z. Li and J. Hao, *Chem. Commun.*, 2019, **55**, 7370.
- [11] J. Zhang, Y. Ji, P. Wang, Q. Shao, Y. Li and X. Huang, *Adv. Funct. Mater.*, 2019, **30**, 1906579.
- [12] M. Wang, F. Li and J. Liu, *RSC Adv.*, 2020, **10**, 29575.
- [13] J. H. Kim, H. Ju, B. S. An, Y. An, K. Cho, S. H. Kim, Y. S. Bae and H. C. Yoon, *ACS Appl. Mater. Interfaces*, 2021, **13**, 61316.
- [14] S. Yu, Q. Wang, J. Wang, Y. Xiang, X. Niu and T. Li, *Int. J. Hydrogen Energy*, 2021, **46**, 14331.
